# Supplementary material for: Feeding rainbow trout with a lipid-enriched diet: effects on fatty acid sensing, regulation of food intake, and cellular signaling pathways
Source: Oxford University Press journal article supplement (doi:10.1242/jeb.123802), 2015-01-01
Supplement: jeb123802supp.pdf [file jeb123802supp.pdf]

**Table S1. Nucleotide sequences of the PCR primers used to evaluate mRNA abundance by RT-PCR (qPCR)**

|             | Forward primer          | Reverse primer          | Database | Accession number          |
|-------------|-------------------------|-------------------------|----------|---------------------------|
| β-actin     | GATGGGCCAGAAAGACAGCTA   | TCGTCCCAGTTGGTGACGAT    | GenBank  | NM_001124235.1            |
| ACC         | TGAGGGCGTTTTCACTATCC    | CTCGATCTCCCTCTCCACT     | Sigenae  | tcbk0010c.b.21_5.1.om.4   |
| ACLY        | CTGAAGCCCAGACAAGGAAG    | CAGATTGGAGGCCAAGATGT    | GenBank  | CA349411.1                |
| AgRP        | ACCAGCAGTCCTGTCTGGGTAA  | AGTAGCAGATGGAGCCGAACA   | GenBank  | CR376289                  |
| CART        | ACCATGGAGAGCTCCAG       | GCGCACTGCTCTCCAA        | GenBank  | NM_001124627              |
| CPT-1a      | TCGATTTTCAAGGGTCTTCG    | CACAACGATCAGCAAACCTGG   | GenBank  | AF327058                  |
| CPT-1c      | CGCTTCAAGAATGGGGTGAT    | CAACCACCTGCTGTTTCTCA    | GenBank  | AJ619768                  |
| FAS         | GAGACCTAGTGGAGGCTGTC    | TCTTGTTGATGGTGAGCTGT    | Sigenae  | tcab0001c.e.06 5.1.s.om.8 |
| FAT/CD36    | CAAGTCAGCGACAAACCAGA    | ACTTCTGAGCCTCCACAGGA    | DFCI     | AY606034.1                |
| HOAD        | GGACAAAGTGGCACCAGCAC    | GGGACGGGGTTGAAGAAGTG    | Sigenae  | tcad0001a.i.15 3.1.om     |
| Kir6.x-like | TTGGCTCCTCTTCGCCATGT    | AAAGCCGATGGTCACCTGGA    | Sigenae  | CA346261.1.s.om.8:1:773:1 |
| LXRα        | TGCAGCAGCCGTATGTGGA     | GCGGCGGGAGCTTCTTGTC     | GenBank  | FJ470291                  |
| NPY         | CTCGTCTGGACCTTTATATGC   | GTTCATCATATCTGGACTGTG   | GenBank  | NM_001124266              |
| POMC-A1     | CTCGCTGTCAAGACCTCAACTCT | GAGTTGGGTTGGAGATGGACCTC | Tigr     | TC86162                   |
| PPARα       | CTGGAGCTGGATGACAGTGA    | GGCAAGTTTTTGCAGCAGAT    | GenBank  | AY494835                  |
| SREBP1c     | GACAAGGTGGTCCAGTTGCT    | CACACGTTAGTCCGCATCAC    | GenBank  | CA048941.1                |
| UCP2a       | TCCGGCTACAGATCCAGG      | CTCTCCACAGACCACGCA      | GenBank  | DQ295324                  |

ACC, Acetyl-CoA carboxylase; ACLY, ATP-citrate lyase; AgRP, Agouti related peptide; CART, cocaine- and amphetamine-related transcript; CPT-1, carnitine palmitoyl transferase type 1; FAS, fatty acid synthetase; FAT/CD36, fatty acid translocase; HOAD, hydroxyacyl-CoA dehydrogenase; Kir6.x-like, inward rectifier K<sup>+</sup> channel pore type 6.x-like; LXRα, liver X receptor α; NPY, neuropeptide Y; POMC-A1, pro-opio melanocortin A1; PPARα, peroxisome proliferator-activated receptor type α; SREBP1c, sterol regulatory element-binding protein type 1c; UCP2a, mitochondrial uncoupling protein 2a. mRNA abundance were determined as described in the same species (Panserat et al., 2000; Ducasse-Cabanot et al., 2007; Kolditz et al., 2008; Lansard et al., 2009; Cruz-Garcia et al., 2009; Conde-Sieira et al., 2010; Polakof et al., 2008, 2010a, 2011b; Figueiredo-Silva et al., 2012c; Sánchez-Gurmaches et al., 2012; MacDonald et al., 2014).
